# Supplementary material
Source: PubMed Central journal article supplement (PMC10257119)
Supplement: mmc1.pdf [file mmc1.pdf]

**Biophysical Journal, Volume 122**

**Supplemental information**

**Interpreting the molecular mechanisms of disease variants in human  
transmembrane proteins**

**Johanna Katarina Sofie Tiemann, Henrike Zschach, Kresten Lindorff-Larsen, and Amelie  
Stein**

## Article

# **SUPPORTING MATERIAL: Interpreting the molecular mechanisms of disease variants in human transmembrane proteins**

Johanna Katarina Sofie Tiemann<sup>1,2</sup>, Henrike Zschach<sup>1,2</sup>, Kresten Lindorff-Larsen<sup>1\*</sup>, and Amelie Stein<sup>2\*</sup>

<sup>1</sup>Linderstrøm-Lang Centre for Protein Science, Department of Biology, University of Copenhagen, DK-2200 Copenhagen N, Denmark.

<sup>2</sup>Section for Computational and RNA Biology, Department of Biology, University of Copenhagen, DK-2200 Copenhagen N, Denmark.

\*Correspondence: lindorff@bio.ku.dk (KL-L)

\*Correspondence: amelie.stein@bio.ku.dk (AS)

## **SUPPLEMENTARY MATERIAL**

### **Supplementary Figures**

---

<sup>1</sup>Present Address: Center for Health Data Science, Faculty of Health and Medical Sciences, University of Copenhagen, DK-2200 Copenhagen N., Denmark.

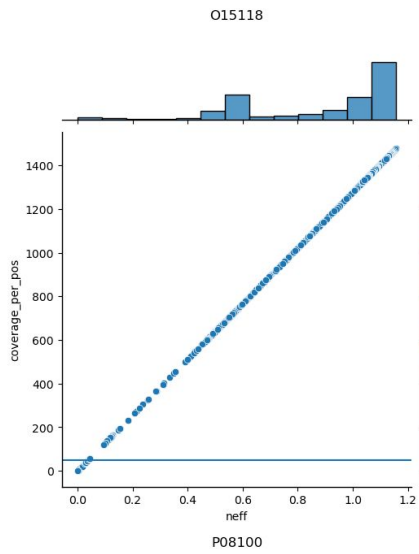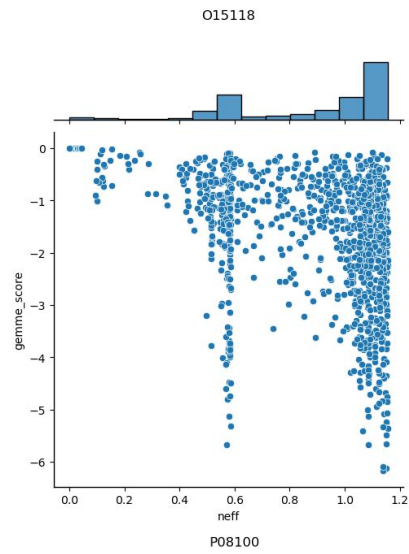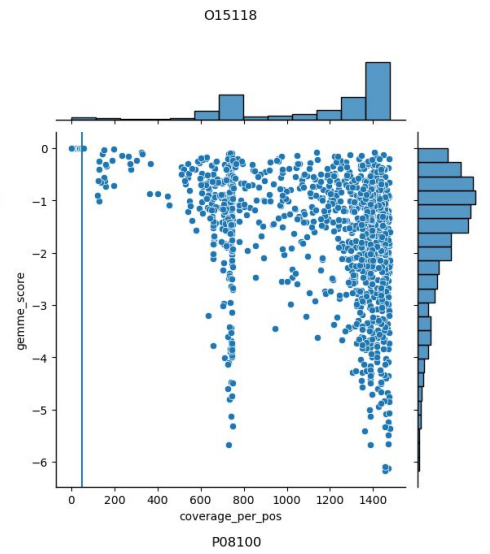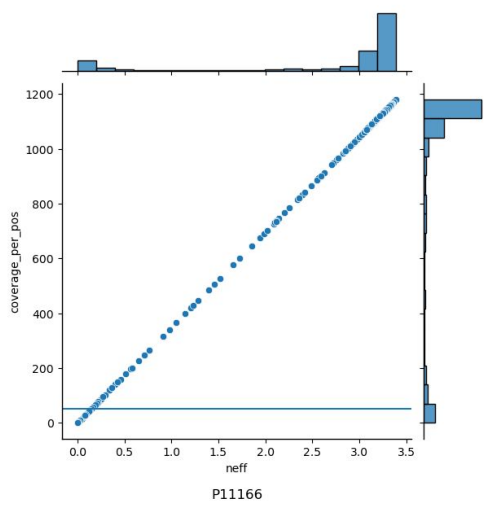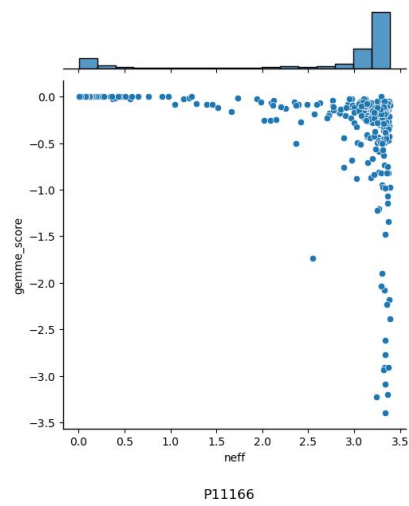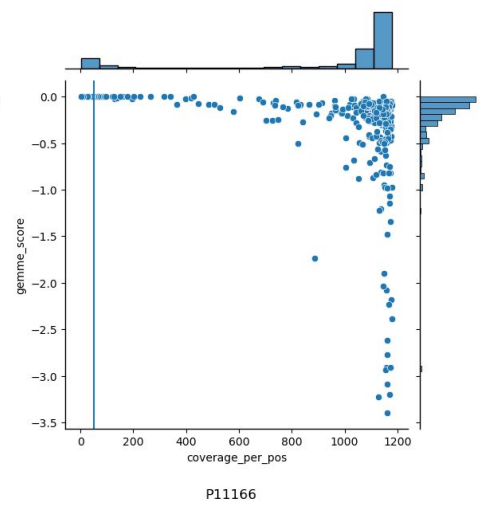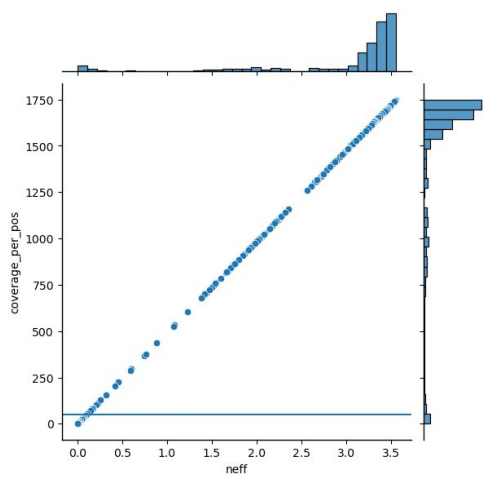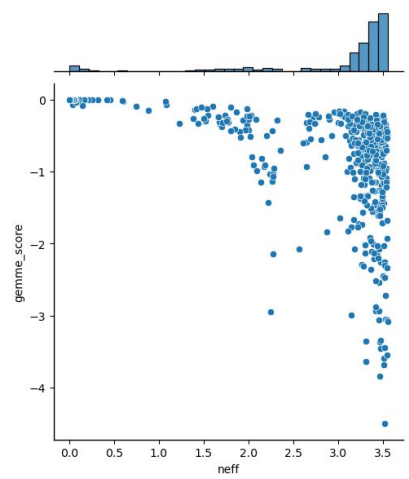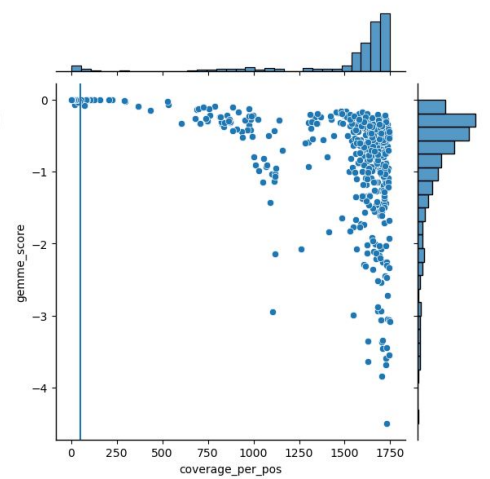

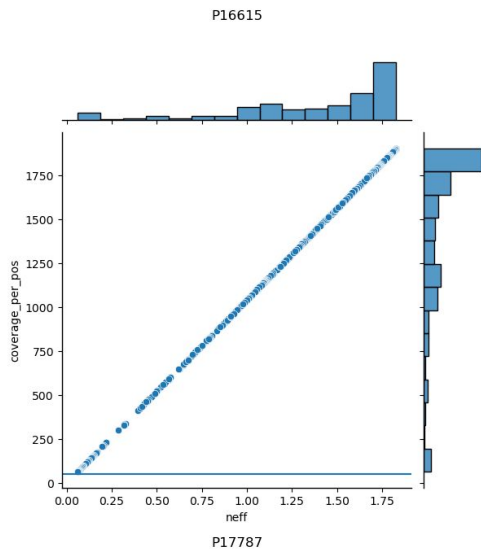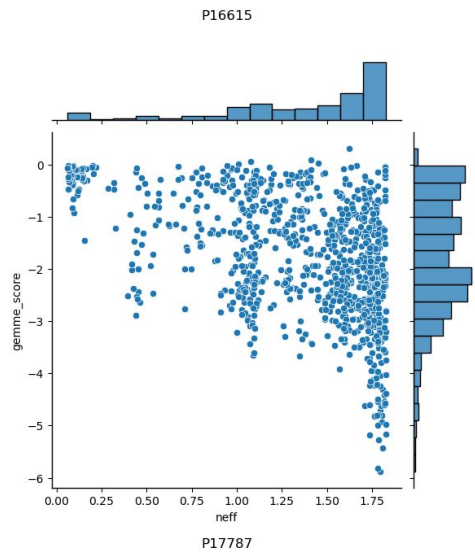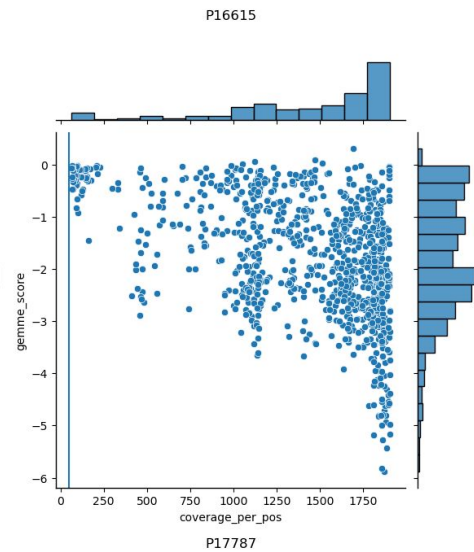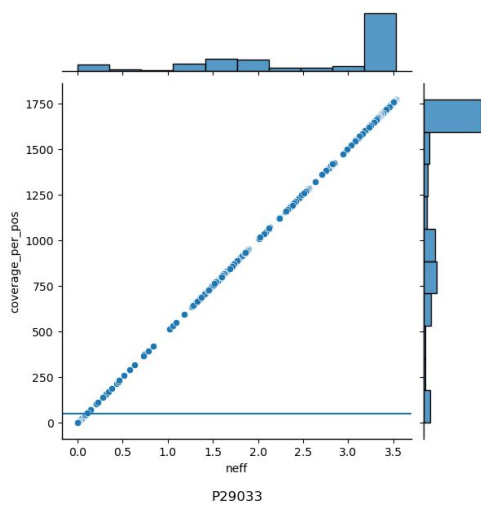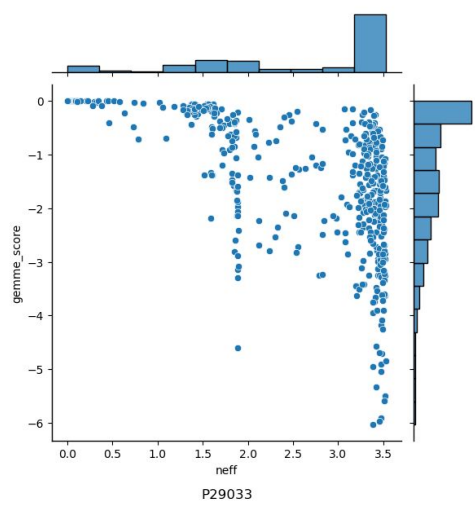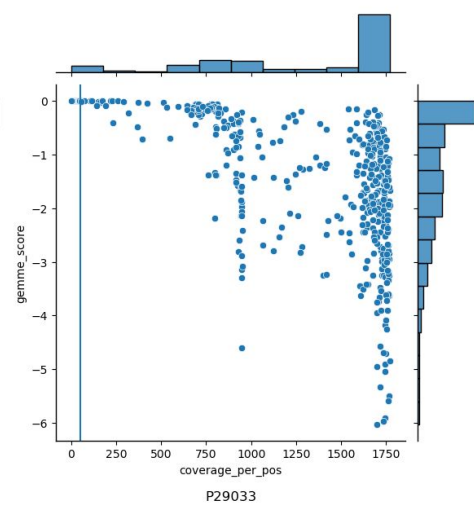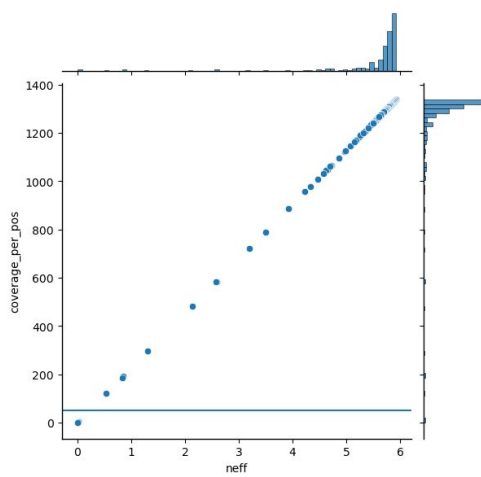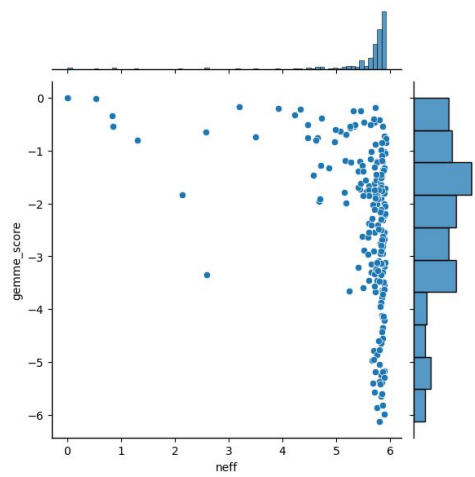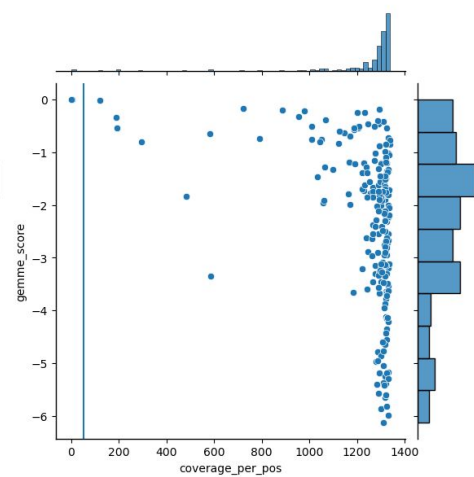

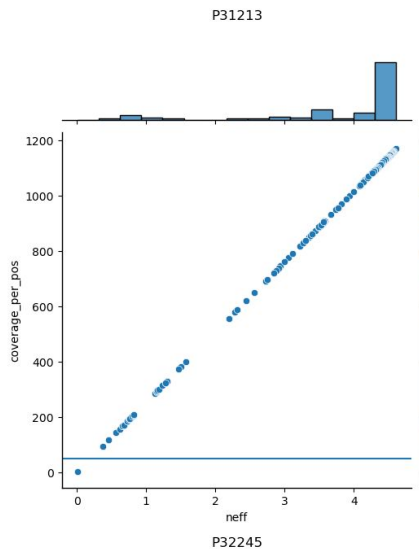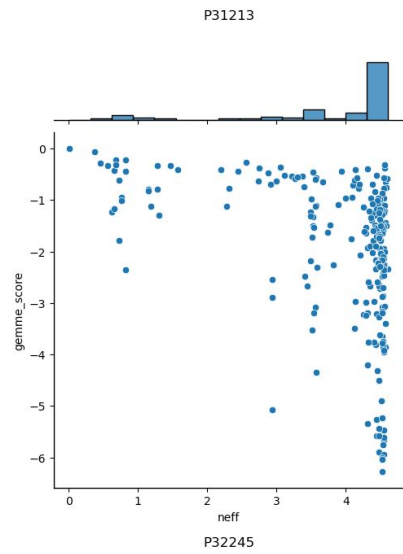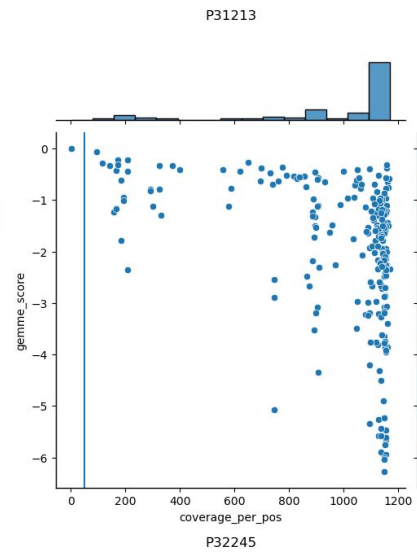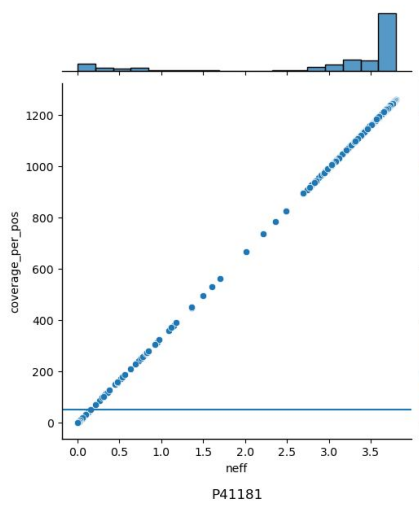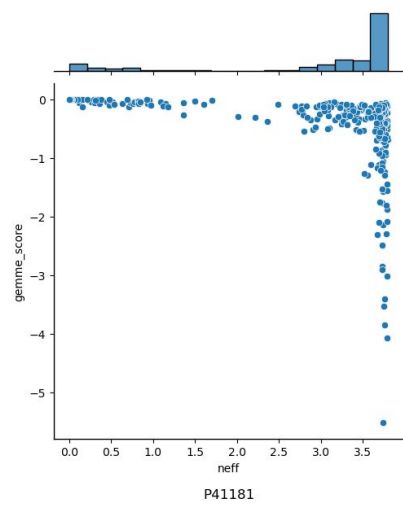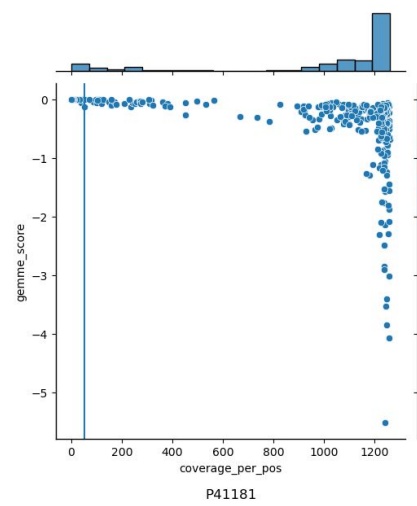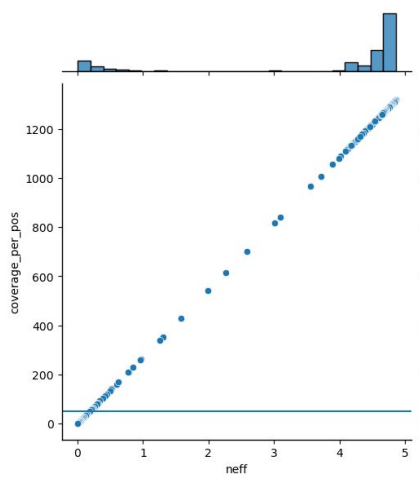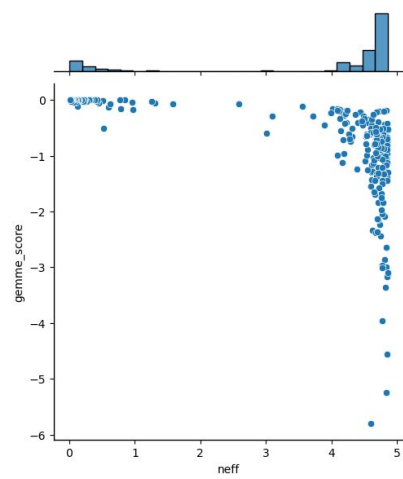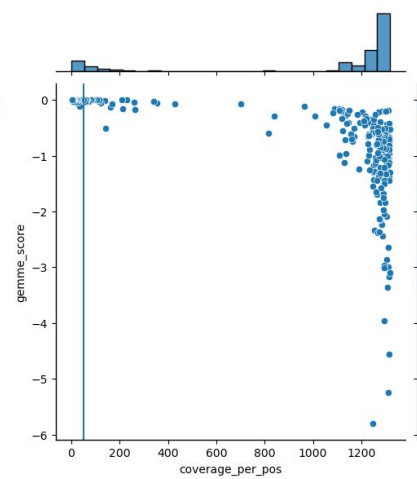

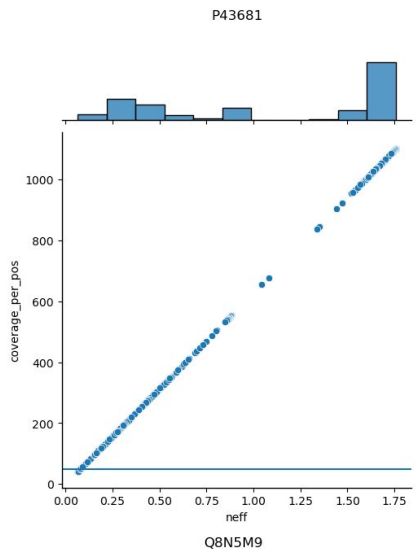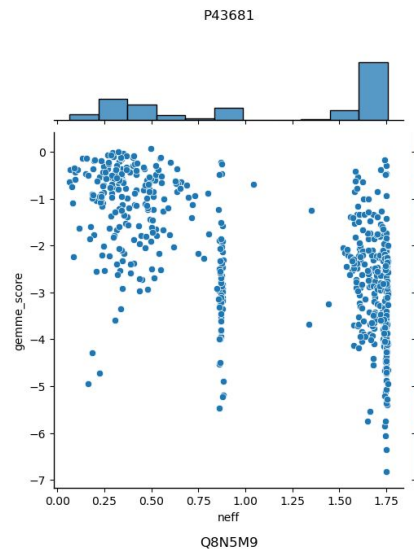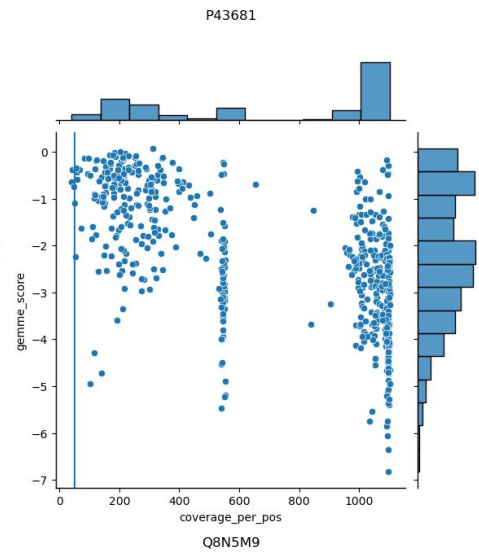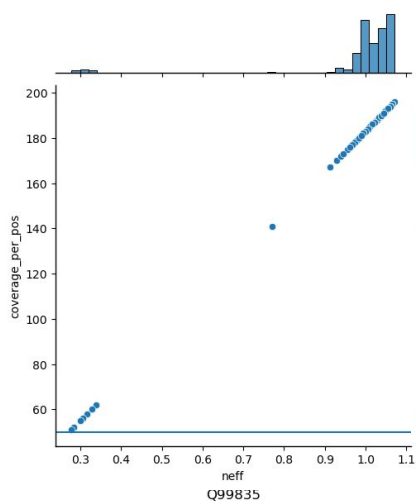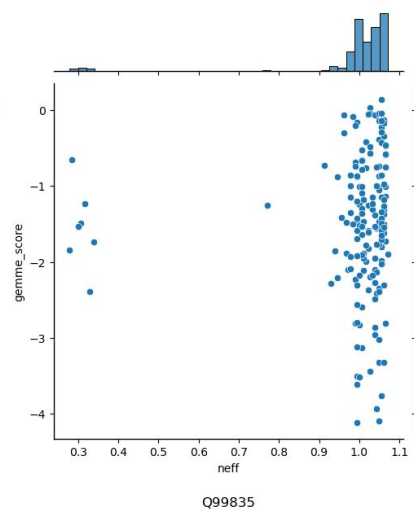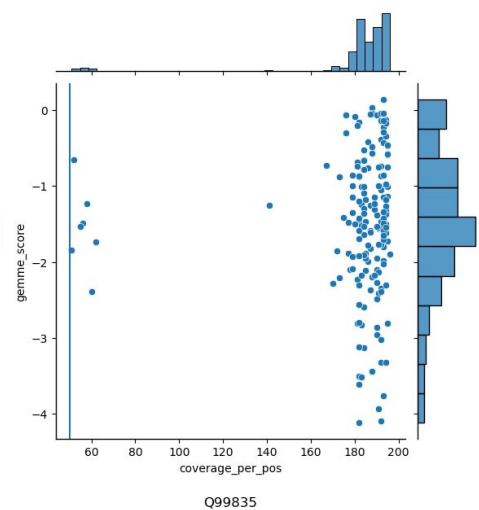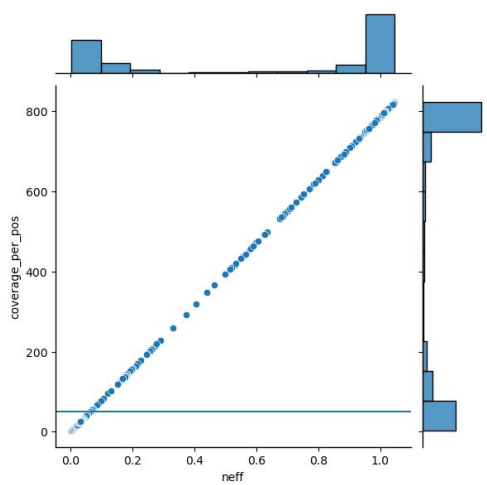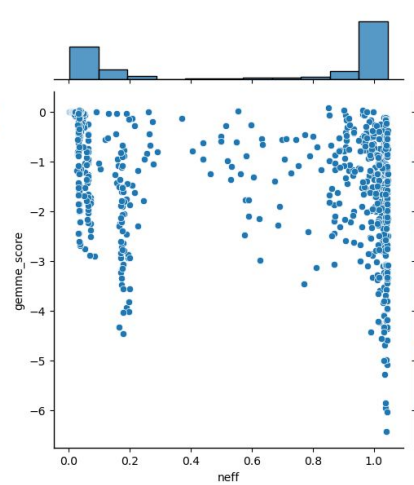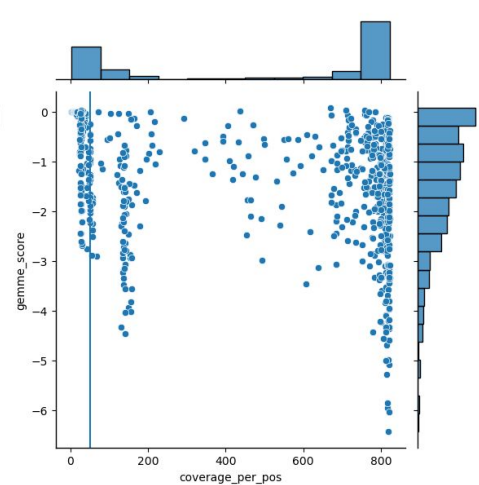

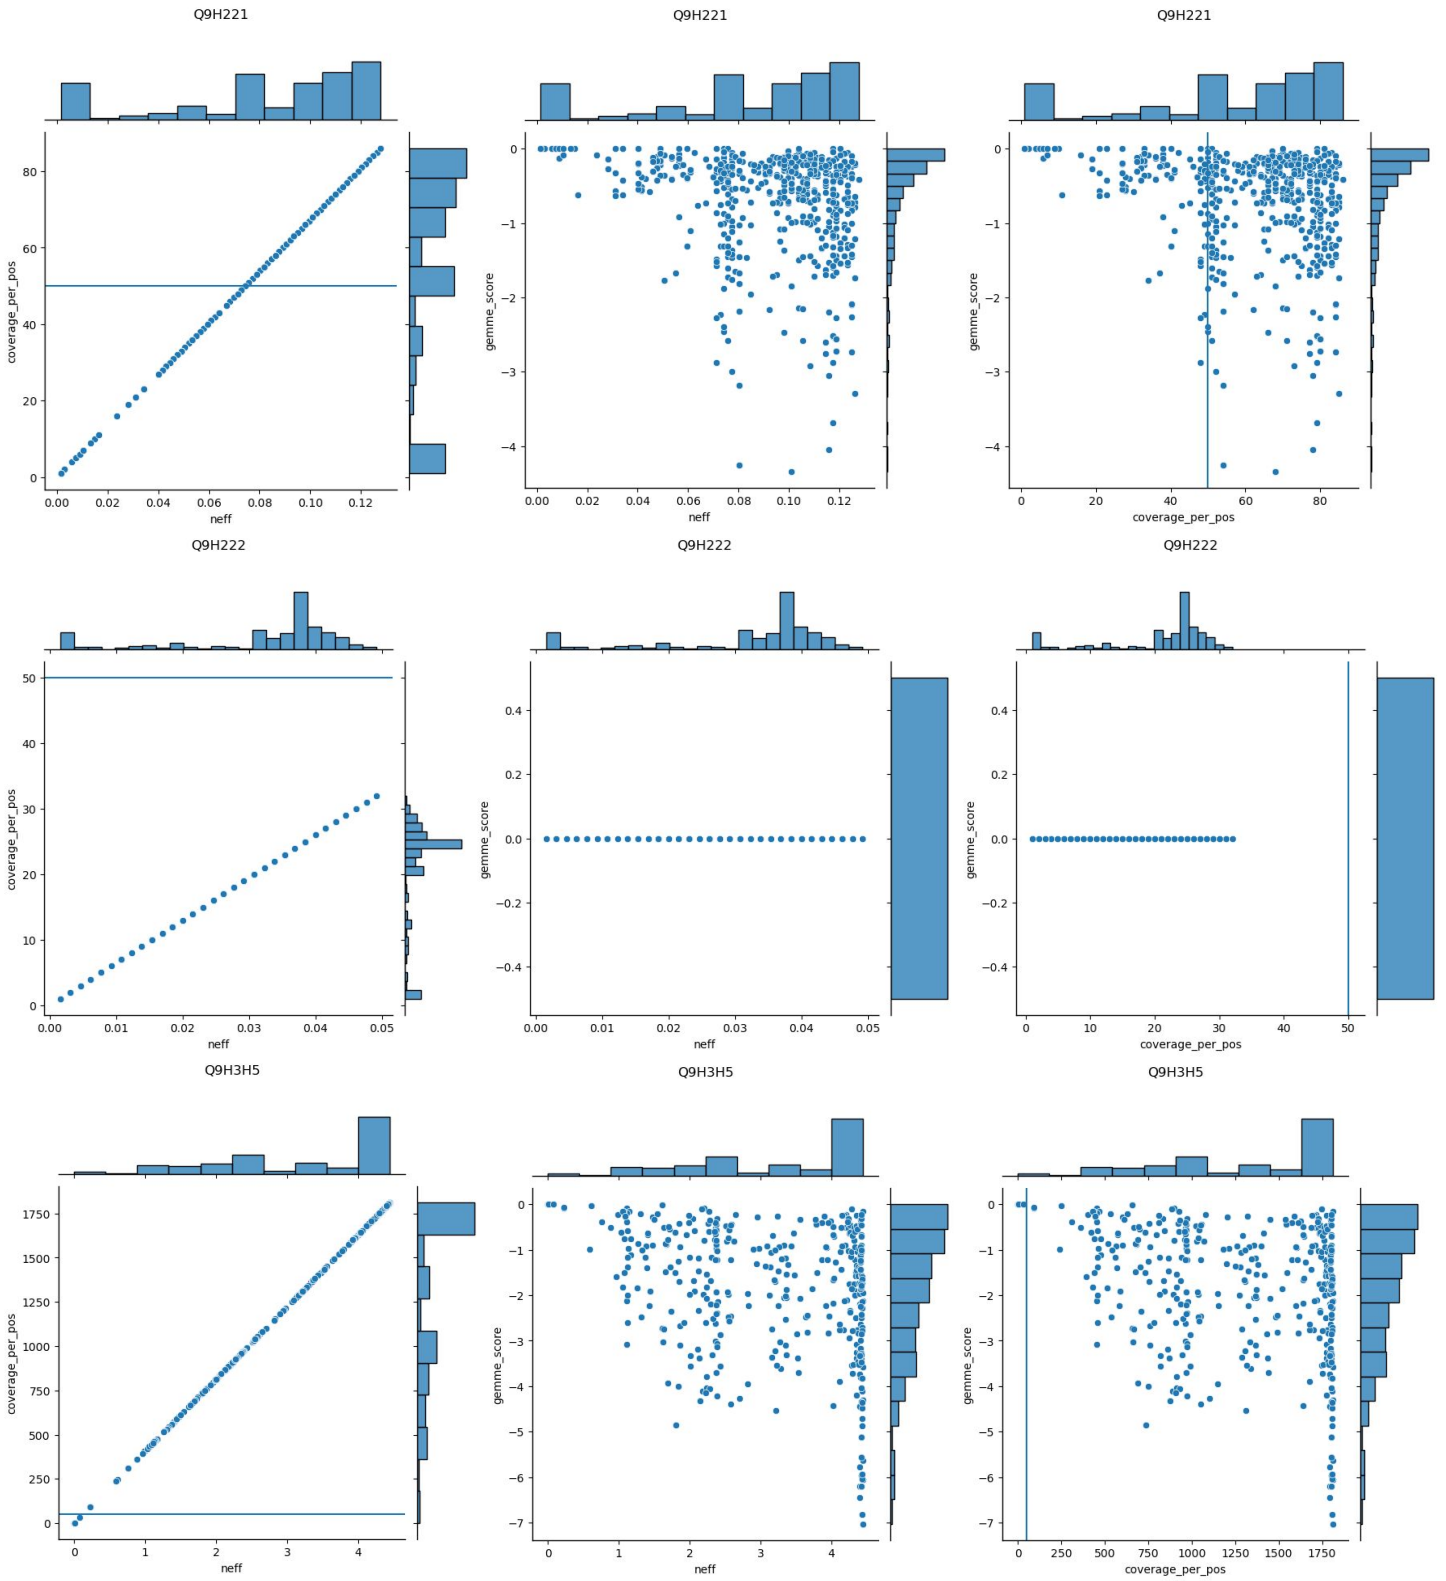

Q9ULV1

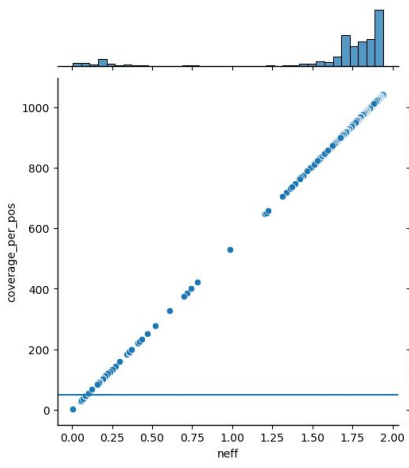

Q9ULV1

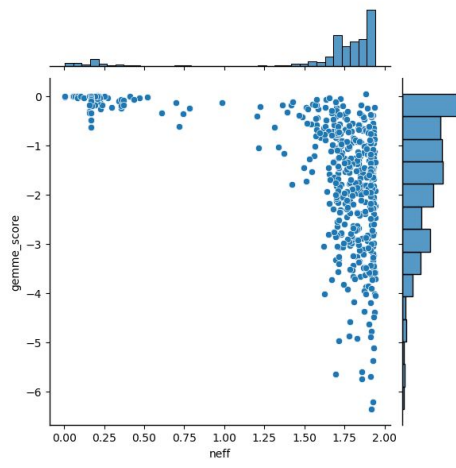

Q9ULV1

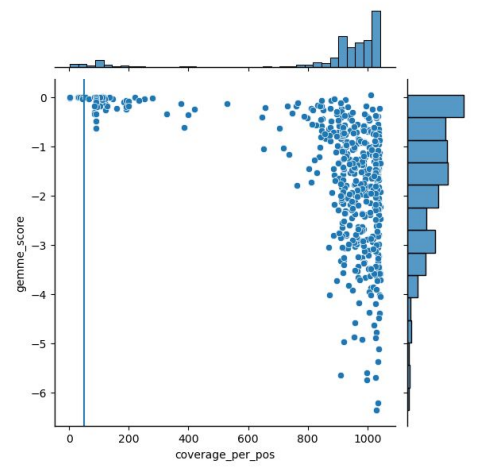



Figure S1: Neff values evaluated against GEMME coevolutionary score and sequence coverage per position: Per protein in the X-ray subset three plots are shown: first, the sequence coverage at each residue position vs. neff; second, the GEMME score (not normalized) vs. neff; third, the GEMME score vs. MSA sequence coverage. For the sequence coverage, our chosen threshold line is drawn at 50.

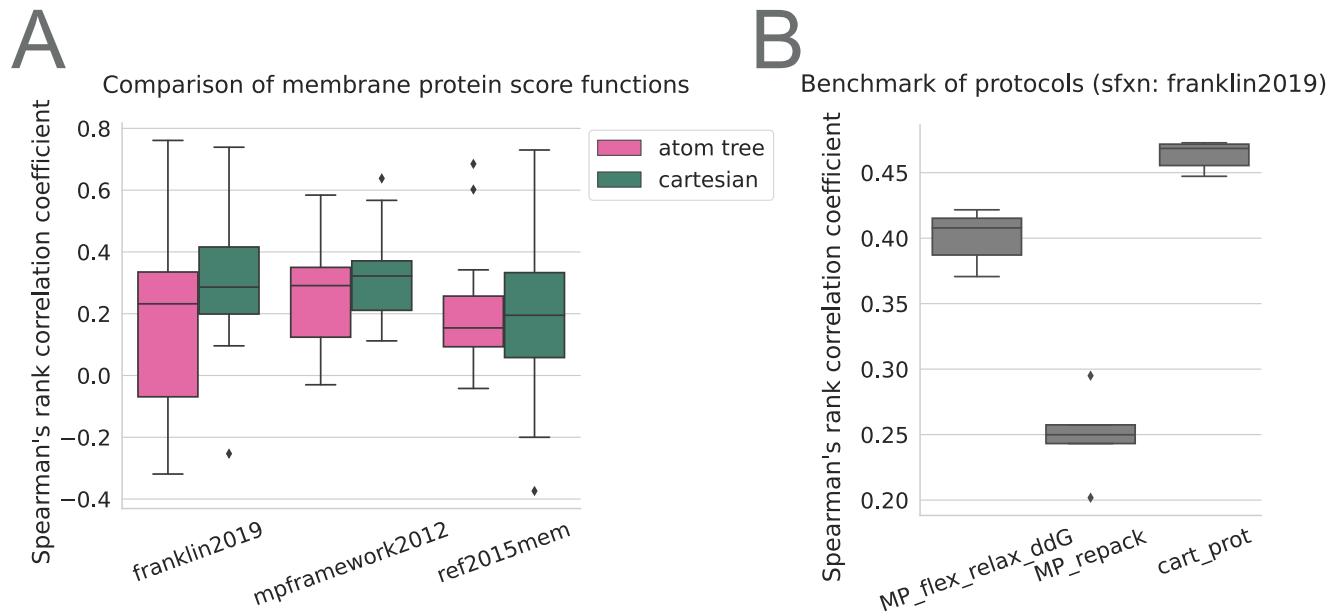

Figure S2: Benchmark of Rosetta  $\Delta\Delta G$  calculations for MPs. (A) Comparison of accuracy of stability calculations performed with different membrane protein score functions but using the same protocol and data set. Data was extracted from (1). (B) Comparison using different protocols but the same score function (franklin2019; (2)) and was conducted on the benchmark set described in table 1 in the main manuscript.

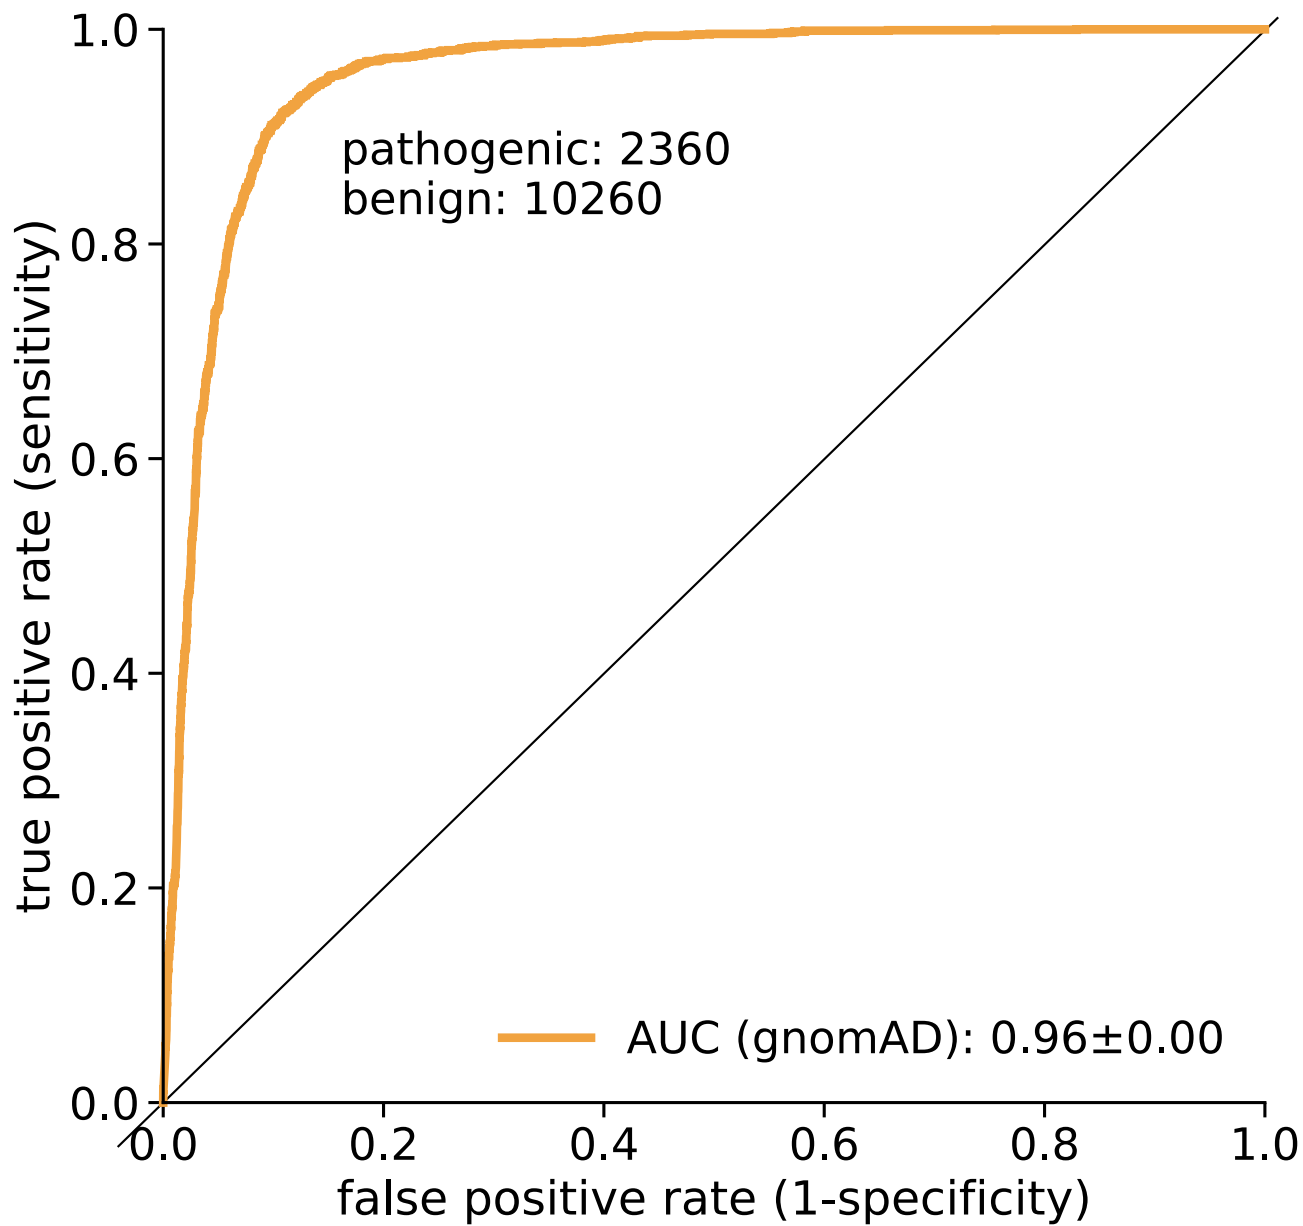

Figure S3: ROC analysis for gnomAD allele frequencies

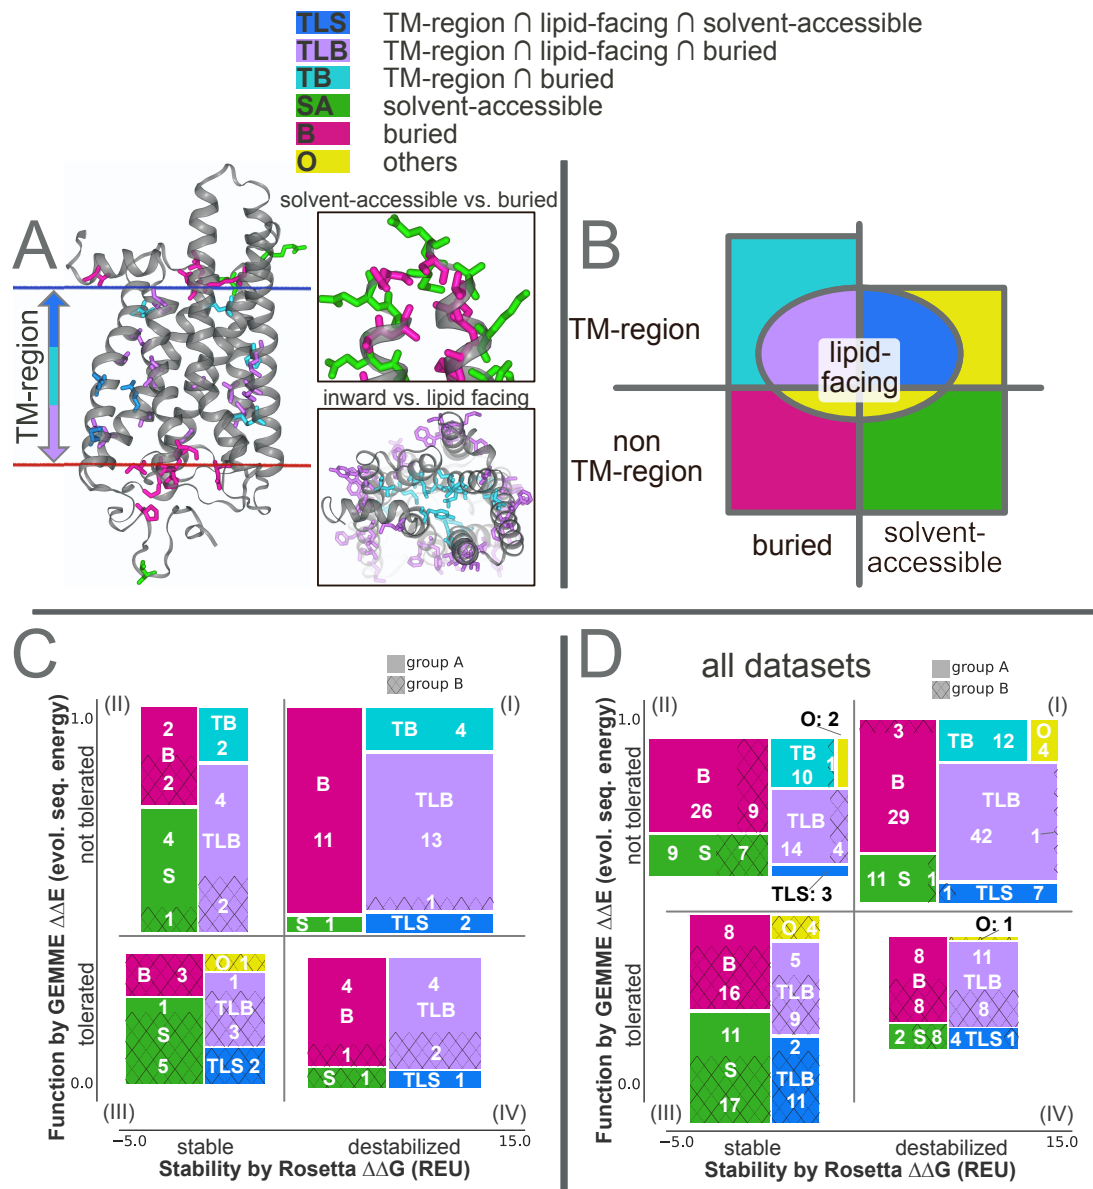

Figure S4: Protein regions and their overlaps and analysis of GPCR variant classification performance and structural differences of variant effects. (A) [left] Illustration of the different residue categories used in this work on OPSD, namely, whether they are inside (dark blue, turquoise, and violet) or outside of the transmembrane (TM) region (green and pink), and their orientation towards the membrane (lipid-facing: blue and violet), and whether they are solvent-accessible or buried. The structure on the left shows disease-associated variants, while the two inserts on the right illustrate solvent-accessible vs. buried, and inwards vs. lipid-facing, more generally and are not restricted to a disease relationship. Variants labeled with *other* are rare combinations, e.g., residues within the TM region that are solvent accessible but do not face the membrane, and some at the intersection between the membrane and the solvent (like lipid-facing but not placed within the TM region; see note in Limitations section). (B) Overview about the protein region distribution. (C) Similar as Fig.3C, variant counts in the four quadrants, separated by their position in the proteins, are shown for *group A* (pathogenic, full) and *group B* (benign and/or non-rare, hashed) variants. (D) Variant counts as seen in (C) are shown summed over all 15 proteins.

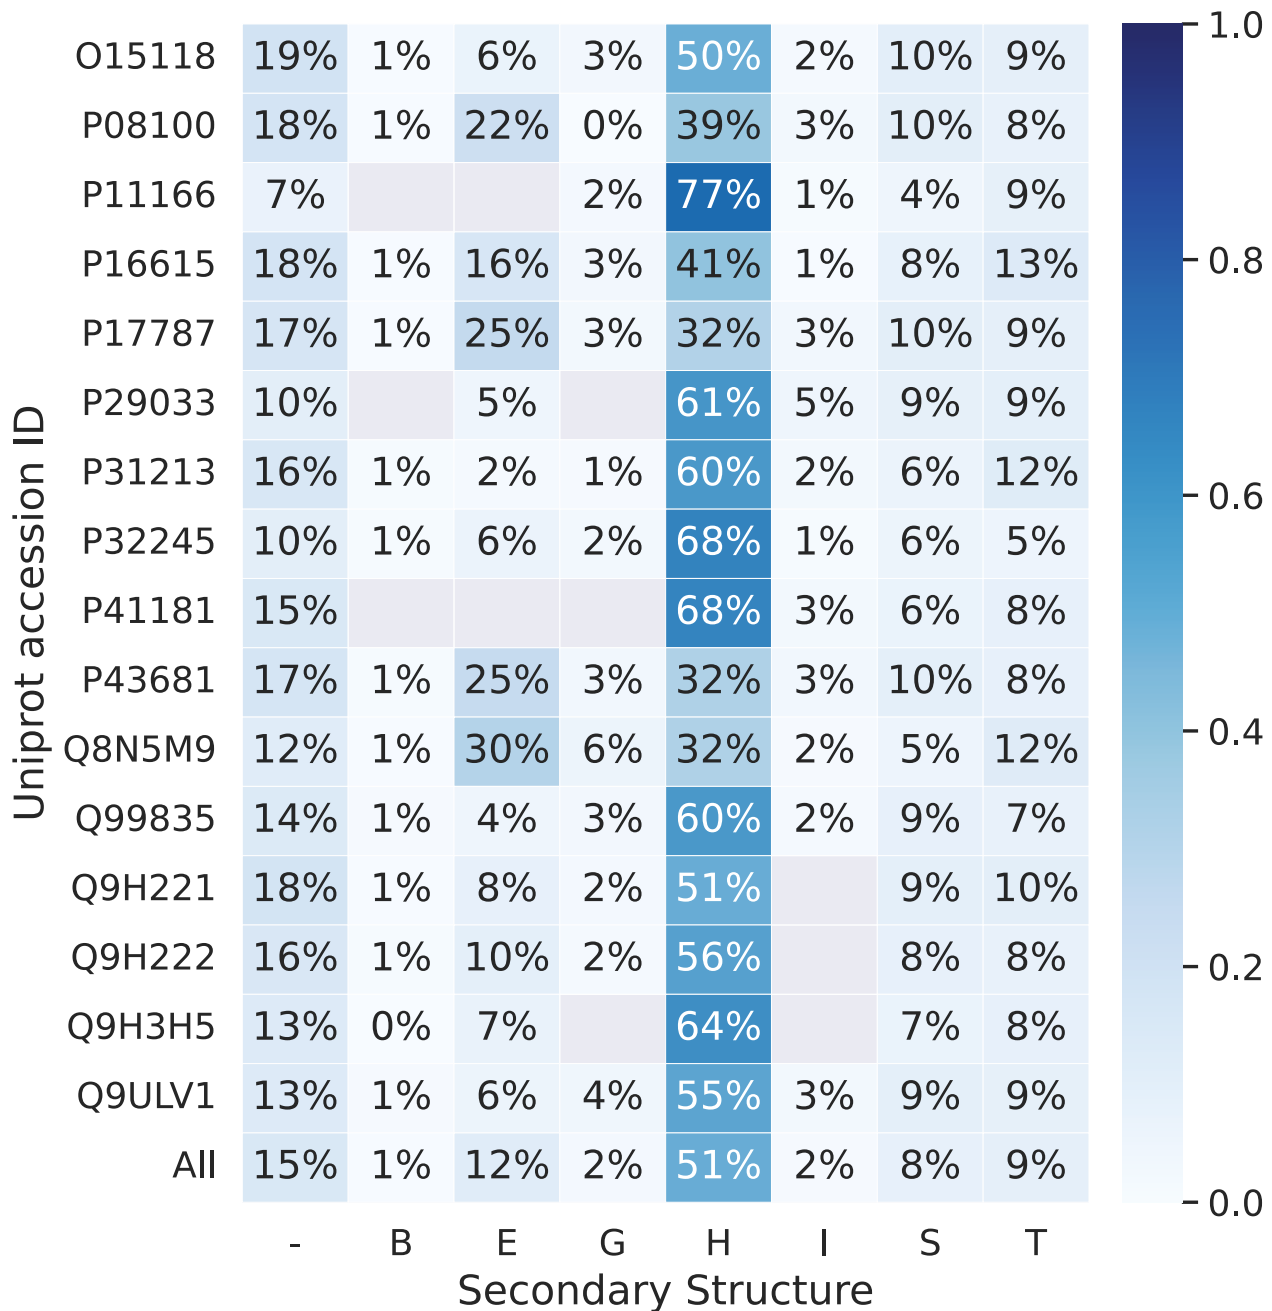

Figure S5: Secondary structure of target dataset calculated using DSSP (3). Abbreviation stand for H =  $\alpha$ -helix; B = residue in isolated  $\beta$ -bridge; E = extended strand, participates in  $\beta$  ladder; G = 3-helix ( $3_{10}$  helix); I = 5 helix ( $\pi$ -helix); T = hydrogen bonded turn; S = bend; - = unstructured

## Supplementary Tables

Table S1: Experimental  $\Delta\Delta G$  datasets (all from E. coli) used for benchmarking. Multiple variant counts indicate different pH, labeling tags or temperatures.

| uniprotID | protein | #variants    | reference |
|-----------|---------|--------------|-----------|
| P09391    | GLPG    | 6, 3         | (4)       |
| P09391    | GLPG    | 69           | (5)       |
| P09391    | GLPG    | 142          | (6)       |
| P09391    | GLPG    | 20, 20, 8, 8 | (7)       |
| P09391    | GLPG    | 2            | (8)       |
| P0A910    | OMPA    | 19, 20       | (9)       |
| P0A910    | OMPA    | 15           | (10)      |
| P0A921    | PA1     | 36           | (11)      |
| P0A921    | PA1     | 6, 6, 6      | (12)      |
| P0A921    | PA1     | 49           | (13)      |
| P37001    | PAGP    | 20           | (14)      |
| P37001    | PAGP    | 19, 19       | (15)      |

Table S2: Number of variants annotated by ClinVar or gnomAD for those proteins with at least one experimentally resolved structure per cellular compartment

|                      | all     | Extracellular | Cytoplasmic | Transmembrane | other  |
|----------------------|---------|---------------|-------------|---------------|--------|
| total                | 281,220 | 112,643       | 61,112      | 29,944        | 77,521 |
| benign               | 2,089   | 957           | 495         | 169           | 4,029  |
| benign $\cap$ gnomAD | 1,951   | 883           | 467         | 155           | 446    |
| pathogenic           | 4,030   | 1,430         | 1,118       | 807           | 3,822  |
| patho. $\cap$ gnomAD | 1,046   | 326           | 320         | 208           | 192    |
| VUS (ClinVar)        | 18,882  | 7,592         | 5,962       | 1,974         | 3,354  |
| VUS $\cap$ gnomAD    | 9,685   | 3,777         | 3,190       | 908           | 1,810  |
| only gnomAD          | 256,219 | 102,664       | 53,537      | 26,994        | 73,024 |

Table S3: Variant counts, AUC and variant counts within the quadrants for each protein class. Cutoffs are taken from the complete dataset.

| class         | protein class info |              | after filtering |         | AUC              |                  | Q I     |         | Q II    |         | Q III   |         | Q IV    |         |
|---------------|--------------------|--------------|-----------------|---------|------------------|------------------|---------|---------|---------|---------|---------|---------|---------|---------|
|               | # proteins         | subselection | group A         | group B | $\Delta\Delta G$ | $\Delta\Delta E$ | group A | group B |
| Cell Junction | 1                  | all          | 33              | 16      | 0.42             | 0.84             | 8       | 1       | 12      | 0       | 8       | 11      | 5       | 4       |
|               |                    | TM region    | 24              | 8       | 0.47             | 0.78             | 6       | 1       | 9       | 0       | 4       | 6       | 5       | 1       |
| Enzyme        | 2                  | all          | 24              | 10      | 0.62             | 0.83             | 12      | 0       | 8       | 3       | 2       | 4       | 2       | 3       |
|               |                    | TM region    | 6               | 33      | 1                | 0.83             | 4       | 0       | 0       | 1       | 0       | 1       | 2       | 1       |
| GPCR          | 4                  | all          | 54              | 24      | 0.79             | 0.83             | 31      | 1       | 12      | 5       | 2       | 14      | 9       | 4       |
|               |                    | TM region    | 31              | 11      | 0.81             | 0.87             | 19      | 1       | 6       | 2       | 1       | 5       | 5       | 3       |
| Ion channel   | 3                  | all          | 11              | 12      | 0.72             | 0.81             | 6       | 1       | 3       | 3       | 2       | 8       | 0       | 20      |
|               |                    | TM region    | 4               | 3       | 0.42             | 0.75             | 1       | 0       | 2       | 1       | 1       | 2       | 0       | 0       |
| Transporter   | 5                  | all          | 98              | 42      | 0.63             | 0.82             | 48      | 3       | 29      | 9       | 12      | 20      | 9       | 10      |
|               |                    | TM region    | 44              | 10      | 0.71             | 0.97             | 27      | 0       | 11      | 1       | 2       | 6       | 4       | 3       |

## Additional Supplementary Tables

### Additional Supplementary Table 1:

**Information of variants for each X-ray PDB with at least 1 benign and 1 pathogenic variant:** [2022\\_05\\_05-count\\_hMP\\_anno\\_splitPDB\\_Xray\\_publish.xlsx](#)

The extended supplemental table is a collection of variant information (ClinVar and gnomAD per cellular compartment) per protein (each in a separate worksheet tab) per PDB-ID and chain. This is only generated for proteins, where at least one benign and one pathogenic variant is located in an experimentally resolved region. Further the StrucSel score (see Methods and Materials) is given, including further information about the PDB

### Additional Supplementary Table 2:

**Variant counts per protein:** [2022\\_11\\_11-count\\_hMP\\_anno\\_nonsyndel\\_PDB\\_publish.xlsx](#)

The extended supplemental table is a collection of all displayed data and additional information on the data shown in the main manuscript and the supplement, including worksheet tabs:

- *2022\_05\_05-count\_hMP\_Clinvar\_gnomad\_PDB\_nonsyndel\_df*: contains a statistic of variant counts and PDB ids for each human membrane proteins that was experimentally resolved (data fetched by 2022-05-05)
- *Variant\_annotation*: variant count from ClinVar and gnomAD for all human membrane proteins separated by cellular compartments
- *Variant\_annotation\_hP*: variant and protein count from ClinVar and gnomAD for all human proteins
- *Variant\_annotation\_PDB*: variant count from ClinVar and gnomAD for all human membrane proteins that are located in experimentally resolved protein regions, separated by cellular compartments
- *Category\_variant\_annotation*: variant count from ClinVar and gnomAD for all human membrane proteins separated by their membrane protein category and further subdivided into the variants located in the membrane bilayer; protein counts per category are also added.
- *Category\_variant\_annotation\_PDB*: variant count from ClinVar and gnomAD for all human membrane proteins that are located in experimentally resolved protein regions, separated by their membrane protein category and further subdivided into the variants located in the membrane bilayer; protein counts per category are also added.
- *exp\_ddg\_benchmark*: data used for Rosetta stability benchmark (Supplementary Material table [S1](#)).
- *X-ray\_set*: X-ray protein information table (equal to table 1)
- *X-ray\_set\_app*: extended X-ray protein information table including variant counts after each sequential filtering steps and GEMME/MSA statistics
- *X-ray\_set\_app\_AUC*: further extended X-ray protein information table (from worksheet tab *X-ray\_set\_app*) including additionally the AUC calculations (error via bootstrapping) for each filtered set of variants and the sequential filtered remaining data.
- *classes*: AUC and quadrant variant counts for each protein class in total and in the TM region.

## Supporting References

## REFERENCES

1. Koehler Leman, J., S. Lyskov, S. M. Lewis, J. Adolf-Bryfogle, R. F. Alford, K. Barlow, Z. Ben-Aharon, D. Farrell, J. Fell, W. A. Hansen, A. Harmalkar, J. Jeliaskov, G. Kuenze, J. D. Krys, A. Ljubetič, A. L. Loshbaugh, J. Maguire, R. Moretti, V. K. Mulligan, M. L. Nance, P. T. Nguyen, S. Ó Conchúir, S. S. Roy Burman, R. Samanta, S. T. Smith, F. Teets, J. K. S. Tiemann, A. Watkins, H. Woods, B. J. Yachnin, C. D. Bahl, C. Bailey-Kellogg, D. Baker, R. Das, F. DiMaio, S. D. Khare, T. Kortemme, J. W. Labonte, K. Lindorff-Larsen, J. Meiler, W. Schief, O. Schueler-Furman, J. B. Siegel, A. Stein, V. Yarov-Yarovoy, B. Kuhlman, A. Leaver-Fay, D. Gront, J. J. Gray, and R. Bonneau, 2021. Ensuring scientific reproducibility in bio-macromolecular modeling via extensive, automated benchmarks. *Nature Communications* 12:6947. <https://www.nature.com/articles/s41467-021-27222-7>.
2. Alford, R. F., P. J. Fleming, K. G. Fleming, and J. J. Gray, 2021. Protein Structure Prediction and Design in a Biologically Realistic Implicit Membrane. *Biophysical Journal* 120:4635. <https://www.sciencedirect.com/science/article/pii/S0006349521007530>.
3. Touw, W. G., C. Baakman, J. Black, T. A. H. te Beek, E. Krieger, R. P. Joosten, and G. Vriend, 2015. A series of PDB-related databanks for everyday needs. *Nucleic Acids Research* 43:D364–368.
4. Gaffney, K. A., and H. Hong, 2018. The rhomboid protease GlpG has weak interaction energies in its active site hydrogen bond network. *Journal of General Physiology* 151:282–291. <https://doi.org/10.1085/jgp.201812047>.
5. Paslawski, W., O. K. Lillelund, J. V. Kristensen, N. P. Schafer, R. P. Baker, S. Urban, and D. E. Otzen, 2015. Cooperative folding of a polytopic  $\alpha$ -helical membrane protein involves a compact N-terminal nucleus and nonnative loops. *Proceedings of the National Academy of Sciences* 112:7978–7983. <https://www.pnas.org/content/112/26/7978>.
6. Baker, R. P., and S. Urban, 2012. Architectural and thermodynamic principles underlying intramembrane protease function. *Nature Chemical Biology* 8:759–768. <https://www.nature.com/articles/nchembio.1021>.
7. Guo, R., K. Gaffney, Z. Yang, M. Kim, S. Sungsuwan, X. Huang, W. L. Hubbell, and H. Hong, 2016. Steric trapping reveals a cooperativity network in the intramembrane protease GlpG. *Nature Chemical Biology* 12:353–360. <https://www.nature.com/articles/nchembio.2048>.
8. Min, D., R. E. Jefferson, J. U. Bowie, and T.-Y. Yoon, 2015. Mapping the energy landscape for second-stage folding of a single membrane protein. *Nature Chemical Biology* 11:981–987. <https://www.nature.com/articles/nchembio.1939>.
9. Hong, H., S. Park, R. H. Flores Jiménez, D. Rinehart, and L. K. Tamm, 2007. Role of Aromatic Side Chains in the Folding and Thermodynamic Stability of Integral Membrane Proteins. *Journal of the American Chemical Society* 129:8320–8327. <https://doi.org/10.1021/ja068849o>.
10. Hong, H., G. Szabo, and L. K. Tamm, 2006. Electrostatic couplings in OmpA ion-channel gating suggest a mechanism for pore opening. *Nature Chemical Biology* 2:627–635. <https://www.nature.com/articles/nchembio827>.
11. Moon, C. P., and K. G. Fleming, 2011. Side-chain hydrophobicity scale derived from transmembrane protein folding into lipid bilayers. *Proceedings of the National Academy of Sciences* 108:10174–10177. <https://www.pnas.org/content/108/25/10174>.
12. Stanley, A. M., and K. G. Fleming, 2007. The Role of a Hydrogen Bonding Network in the Transmembrane  $\beta$ -Barrel OMPLA. *Journal of Molecular Biology* 370:912–924. <https://www.sciencedirect.com/science/article/pii/S0022283607006213>.
13. McDonald, S. K., and K. G. Fleming, 2016. Aromatic Side Chain Water-to-Lipid Transfer Free Energies Show a Depth Dependence across the Membrane Normal. *Journal of the American Chemical Society* 138:7946–7950. <https://doi.org/10.1021/jacs.6b03460>.
14. Marx, D. C., and K. G. Fleming, 2017. Influence of Protein Scaffold on Side-Chain Transfer Free Energies. *Biophysical Journal* 113:597–604. [https://www.cell.com/biophysj/abstract/S0006-3495\(17\)30682-3](https://www.cell.com/biophysj/abstract/S0006-3495(17)30682-3).
15. Huysmans, G. H. M., S. A. Baldwin, D. J. Brockwell, and S. E. Radford, 2010. The transition state for folding of an outer membrane protein. *Proceedings of the National Academy of Sciences* 107:4099–4104. <https://www.pnas.org/content/107/9/4099>.
